# Supplementary material for: The ABC Transporter Components HgdB and HgdC are Important for Glycolipid Layer Composition and Function of Heterocysts in Anabaena sp. PCC 7120
Source: PubMed Central journal article supplement (PMC6161253; doi:10.3390/life8030026), 2018-07-02
Supplement: life-08-00026-s001.pdf [file life-08-00026-s001.pdf]

# Supplementary data.

## A

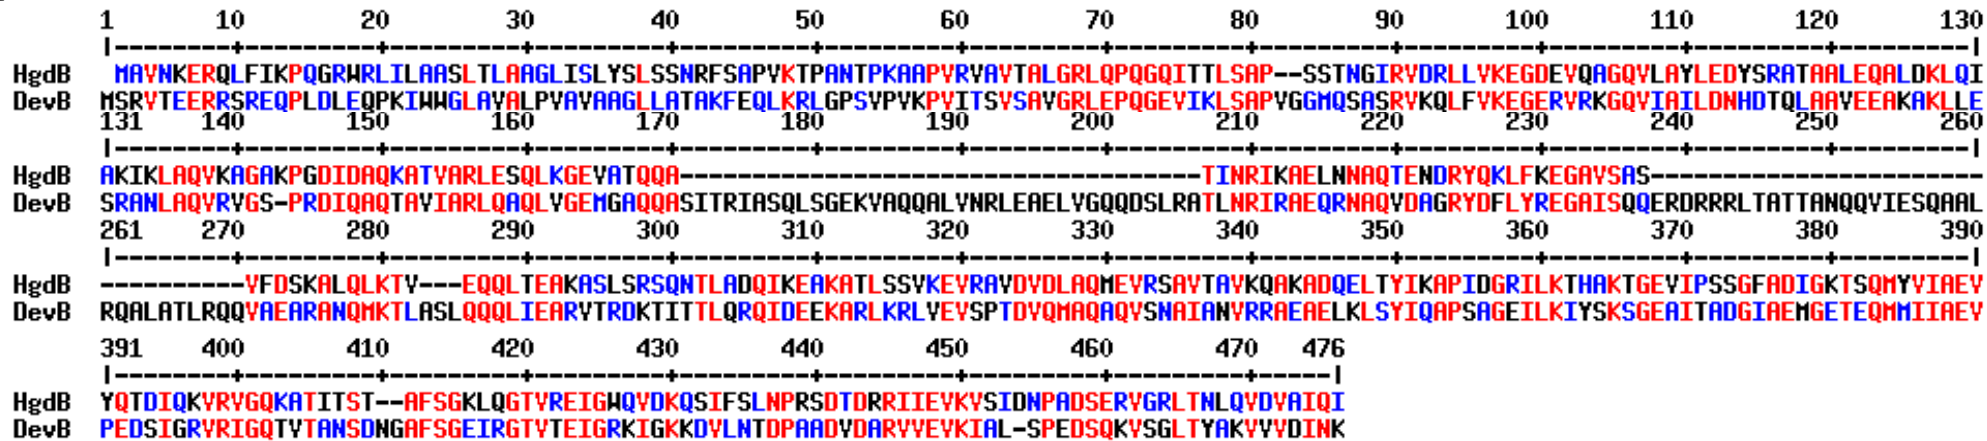

## B

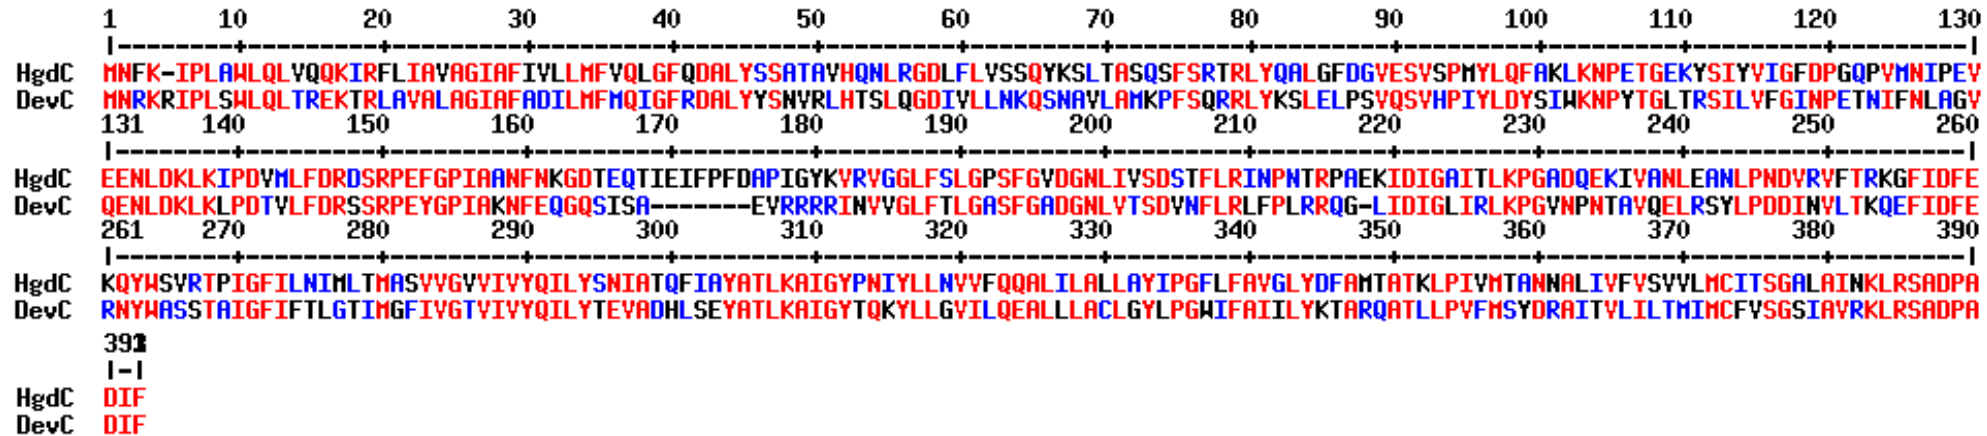

Figure S1. Alignment of amino acid sequences of HgdB with DevB (A) and HgdC with DevC (B).

Alignment was performed using Multalin software [26]. Red color indicates highly similar areas, blue and black colors show low similar areas.

## Supplementary data.

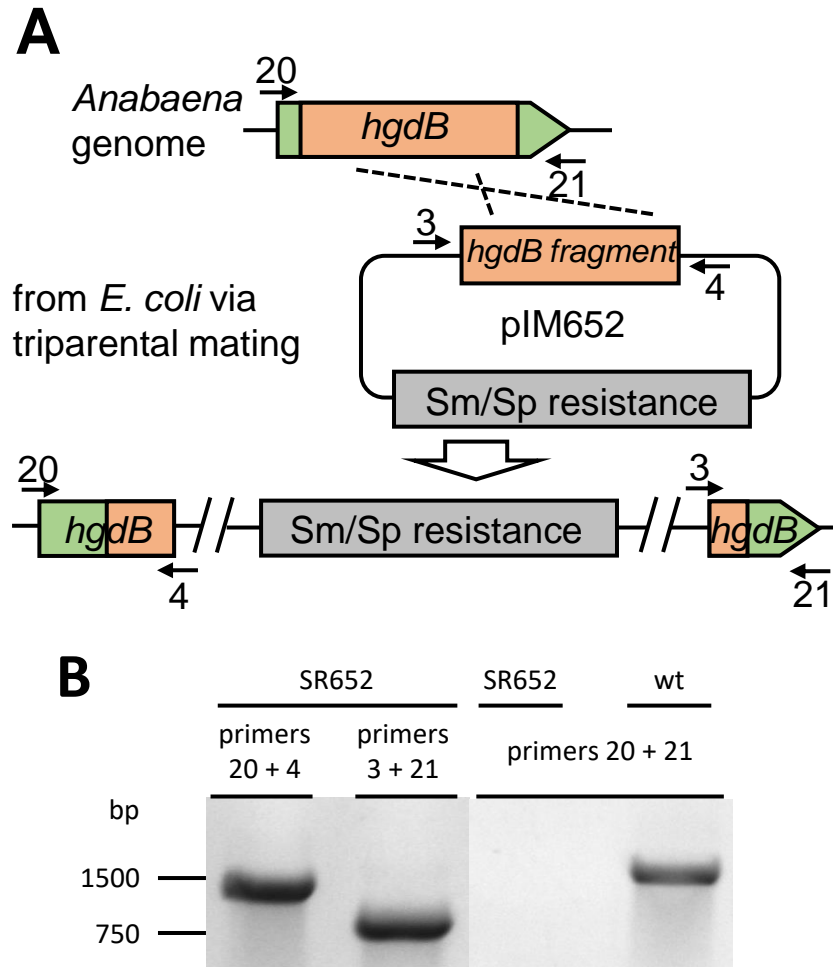

Figure S2. **Segregation of the mutant SR652.**

**A**, Scheme of homologous recombination to obtain the single recombinant SR652 mutant. Arrows with numbers indicate primers (Tab. S1) used for the genotypic analysis of the mutant; **B**, Genotypic analysis of the mutant; SR652 - mutant colony was used as a template for PCR, wt – wild type colony was used as the template. Numbers correspond to those depicted on **A**.

## Supplementary data.

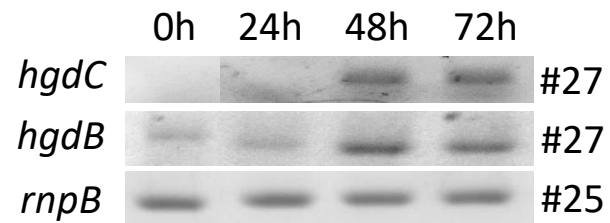

Figure S3. **Time-dependent expression analysis of *hgdC* and *hgdB* genes in the WT culture during nitrogen starvation by RT-PCR.** *rnpB* corresponds to ribonuclease B, which was used as a positive control. Numbers at the right side of the table are numbers of PCR cycles.

## Supplementary data.

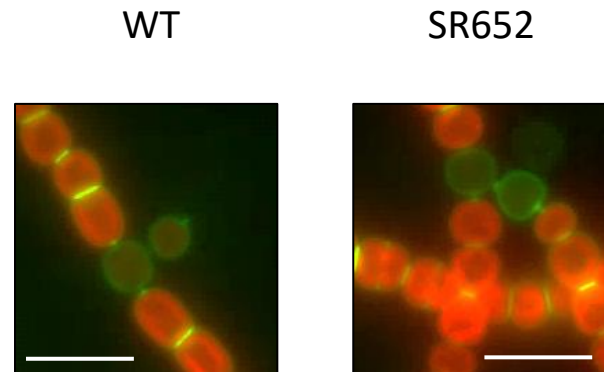

**Figure S4. Vancomycin-FL staining of WT and SR652 mutant filaments.**

Vancomycin-FL (green fluorescence) is a fluorescent stain that binds to the peptidoglycan. Red color corresponds to the autofluorescence of cells. Bars are 5  $\mu\text{m}$  long.

## Supplementary data.

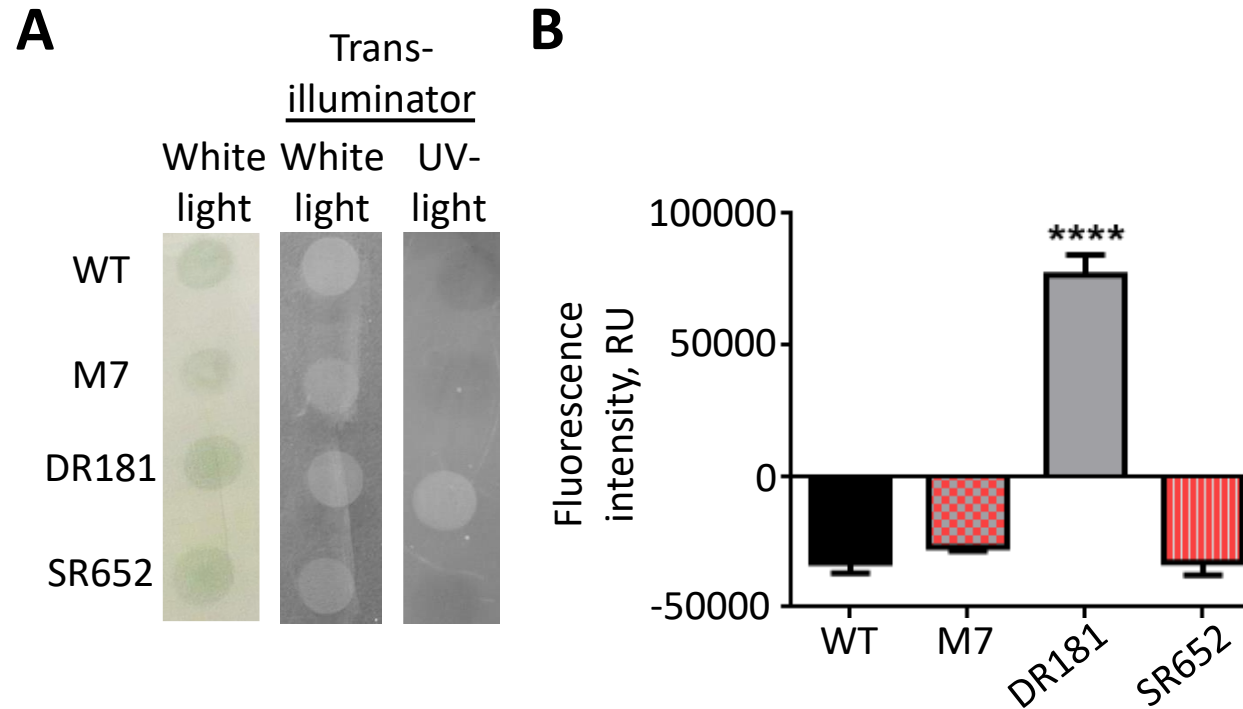

Figure S5. **Retention of ethidium bromide by the SR652 mutant in comparison to the WT, the TolC-deficient mutant DR181, and the DevA-deficient mutant M7.**

**A**, Behavior of *Anabaena* WT and mutant cultures on the solid BG11 medium containing 0.5 µg/ml Ethidium bromide after 16 hours growth starting at 0.1 µg of chlorophyll a; **B**, evaluation of EtBr retention by calculating the relative intensity (RU – relative units) of EtBr fluorescence under UV-light in *Anabaena* colonies. The histogram shows the mean values ± SD of two independent experiments. Student's *t* test *P* value is < 0.0001 (\*\*\*\*).

# Supplementary data.

Table S1. *Anabaena* sp. PCC 7120 strains used in the work.

| Number | Name                                   | Reference |
|--------|----------------------------------------|-----------|
| 1      | <i>Anabaena</i> sp. PCC 7120 wild type | [27]      |
| 2      | SR652                                  | This work |
| 3      | SR706                                  | This work |
| 4      | M7 (DevA-defficient mutant)            | [21]      |
| 5      | DR181 (ToIC-defficient mutant)         | [18]      |

Table S2. *E. coli* strains used in the work.

| Number | Name                       | Reference           |
|--------|----------------------------|---------------------|
| 1      | NEB10                      | New England Biolabs |
| 2      | Top10                      | Invitrogen          |
| 3      | HB101 (pRL528)             | [28]                |
| 4      | J53 (RP4)                  | [28]                |
| 5      | Lemo BL21 ( $\lambda$ DE3) | Novagen/Merck       |

Table S3. Plasmids used in the work.

| Number | Name      | Reference        |
|--------|-----------|------------------|
| 1      | pIM652    | This work        |
| 2      | pIM706    | This work        |
| 3      | pRL277    | [57]             |
| 4      | pET42a    | Novagen/Merck    |
| 5      | pASK-IBA3 | IBA Lifesciences |
| 6      | pIM701    | This work        |
| 7      | pIM689    | This work        |

## References:

57. Black, T. A.; Cai, Y.; Wolk, C. P. Spatial expression and autoregulation of *hetR*, a gene involved in the control of heterocyst development in *Anabaena*. *Mol. Microbiol.* **1993**, *9*, 77-84, doi:10.1111/j.1365-2958.1993.tb01670.x.
